# Supplementary material for: Trials in developing a nanoscale material for extravascular contrast-enhanced ultrasound targeting hepatocellular carcinoma
Source: PeerJ. 2020 Dec 7;8:e10403. doi: 10.7717/peerj.10403 (PMC7727372; doi:10.7717/peerj.10403)
Supplement: Supplemental Information 1 — The numbers in the table were the original parameters of sizes of LSPMbs measured using a Zetasizer Nano S90. [file peerj-08-10403-s001.xlsx]

## Sheet: Sheet1
X
	Sizes[1] (d.nm)	Sizes[2] (d.nm)	Sizes[3] (d.nm)	Sizes[4] (d.nm)	Sizes[5] (d.nm)	Sizes[6] (d.nm)	Sizes[7] (d.nm)	Sizes[8] (d.nm)	Sizes[9] (d.nm)	Sizes[10] (d.nm)	Sizes[11] (d.nm)	Sizes[12] (d.nm)	Sizes[13] (d.nm)	Sizes[14] (d.nm)	Sizes[15] (d.nm)	Sizes[16] (d.nm)	Sizes[17] (d.nm)	Sizes[18] (d.nm)	Sizes[19] (d.nm)	Sizes[20] (d.nm)	Sizes[21] (d.nm)	Sizes[22] (d.nm)	Sizes[23] (d.nm)	Sizes[24] (d.nm)	Sizes[25] (d.nm)	Sizes[26] (d.nm)	Sizes[27] (d.nm)	Sizes[28] (d.nm)	Sizes[29] (d.nm)	Sizes[30] (d.nm)	Sizes[31] (d.nm)	Sizes[32] (d.nm)	Sizes[33] (d.nm)	Sizes[34] (d.nm)	Sizes[35] (d.nm)	Sizes[36] (d.nm)	Sizes[37] (d.nm)	Sizes[38] (d.nm)	Sizes[39] (d.nm)	Sizes[40] (d.nm)	Sizes[41] (d.nm)	Sizes[42] (d.nm)	Sizes[43] (d.nm)	Sizes[44] (d.nm)	Sizes[45] (d.nm)	Sizes[46] (d.nm)	Sizes[47] (d.nm)	Sizes[48] (d.nm)	Sizes[49] (d.nm)
	0.4	0.4632	0.5365	0.6213	0.7195	0.8332	0.9649	1.117	1.294	1.499	1.736	2.01	2.328	2.696	3.122	3.615	4.187	4.849	5.615	6.503	7.531	8.721	10.1	11.7	13.54	15.69	18.17	21.04	24.36	28.21	32.67	37.84	43.82	50.75	58.77	68.06	78.82	91.28	105.7	122.4	141.8	164.2	190.1	220.2	255	295.3	342	396.1	458.7
	0.4	0.4632	0.5365	0.6213	0.7195	0.8332	0.9649	1.117	1.294	1.499	1.736	2.01	2.328	2.696	3.122	3.615	4.187	4.849	5.615	6.503	7.531	8.721	10.1	11.7	13.54	15.69	18.17	21.04	24.36	28.21	32.67	37.84	43.82	50.75	58.77	68.06	78.82	91.28	105.7	122.4	141.8	164.2	190.1	220.2	255	295.3	342	396.1	458.7
	0.4	0.4632	0.5365	0.6213	0.7195	0.8332	0.9649	1.117	1.294	1.499	1.736	2.01	2.328	2.696	3.122	3.615	4.187	4.849	5.615	6.503	7.531	8.721	10.1	11.7	13.54	15.69	18.17	21.04	24.36	28.21	32.67	37.84	43.82	50.75	58.77	68.06	78.82	91.28	105.7	122.4	141.8	164.2	190.1	220.2	255	295.3	342	396.1	458.7
y	0	0	0	0	0	0	0	0	0	0	0	0	0	0	0	0	0	0	0	0	0	0	0	0	0	0	0	0	0	0	0	0	0	0	0	0	0.4	1.3	2.8	4.7	6.7	8.6	10.1	11	11.1	10.6	9.4	7.7	5.8
	0	0	0	0	0	0	0	0	0	0	0	0	0	0	0	0	0	0	0	0	0	0	0	0	0	0	0	0	0	0	0	0.1	0.3	0.5	0.6	0.7	0.9	1.3	2.2	3.5	5	6.6	8.1	9.3	10	10.1	9.7	8.8	7.4
	0	0	0	0	0	0	0	0	0	0	0	0	0	0	0	0	0	0	0	0	0	0	0	0	0	0	0	0	0	0	0	0	0	0	0.1	0.6	1.4	2.5	3.7	5	6.3	7.5	8.5	9.3	9.7	9.6	9	7.9	6.4
[truncated: 21 more columns]
