# Supplementary material for: Trials in developing a nanoscale material for extravascular contrast-enhanced ultrasound targeting hepatocellular carcinoma
Source: PeerJ. 2020 Dec 7;8:e10403. doi: 10.7717/peerj.10403 (PMC7727372; doi:10.7717/peerj.10403)
Supplement: Supplemental Information 4 — The numbers in the table were the curated data of measurement of optical density value in the MTT assay obtained from measurements at different times. [file peerj-08-10403-s004.xlsx]

## Sheet: Sheet1
Time（h）0mg/mL		2mg/mL	5mg/mL	10mg/mL	15mg/mL	20mg/mL
0	100	100	100	100	100	100
24	102	102.5	102.6	102.4	102.4	102
48	138.8	138.4	138.5	138.3	138.3	138.1
72	200	197	195	195	194	192
